# Supplementary figures and images for: Doxorubicin‐induced and trastuzumab‐induced cardiotoxicity in mice is not prevented by metoprolol
Source: PubMed Central journal article supplement — ESC Heart Fail. 2021 Feb 2;8(2):928–37. doi: 10.1002/ehf2.13198 (PMC8006653; doi:10.1002/ehf2.13198), 2021-02-02

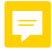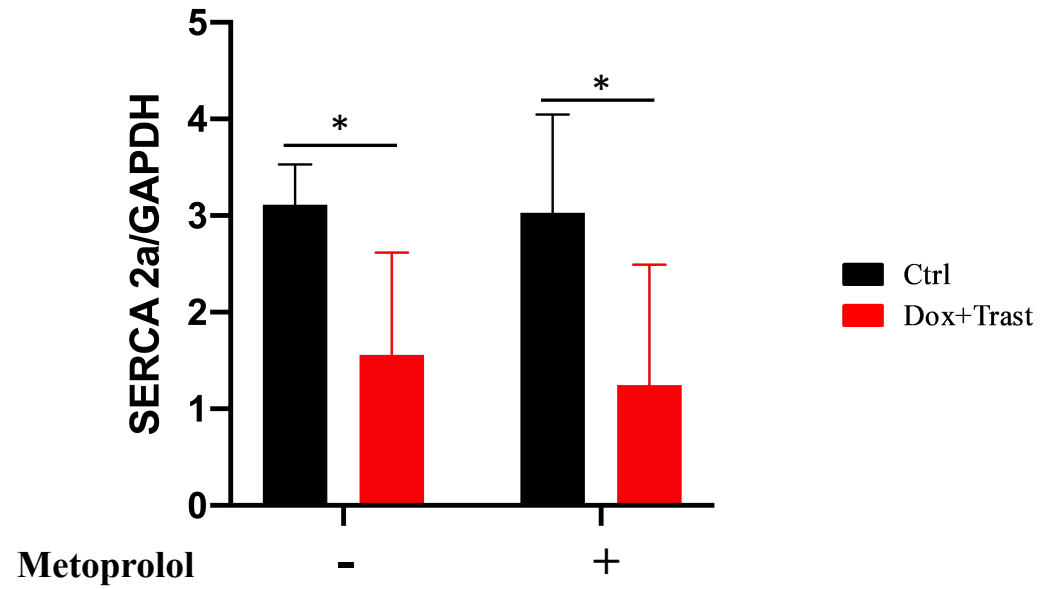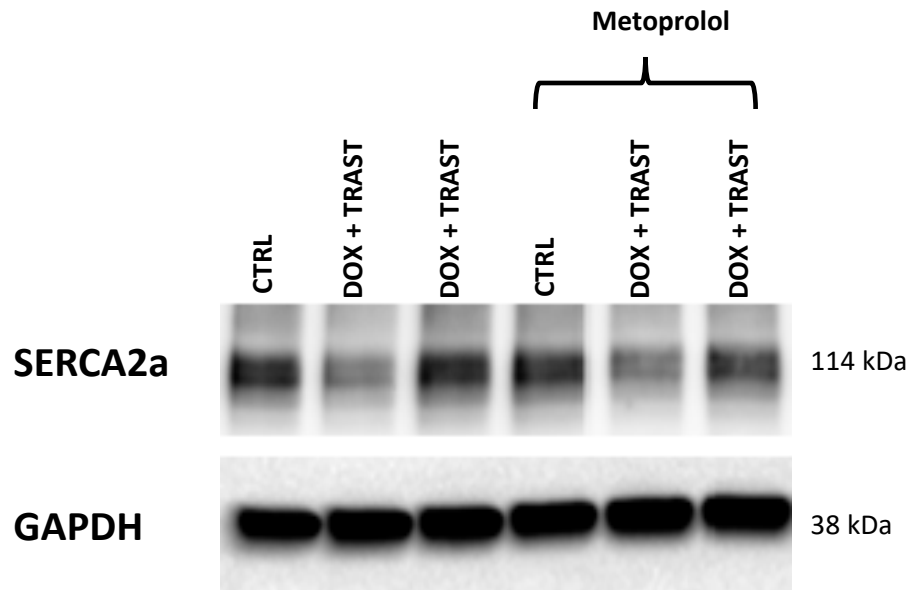

Supplement: EHF2-8-928-s001.pdf [file EHF2-8-928-s001.pdf]

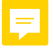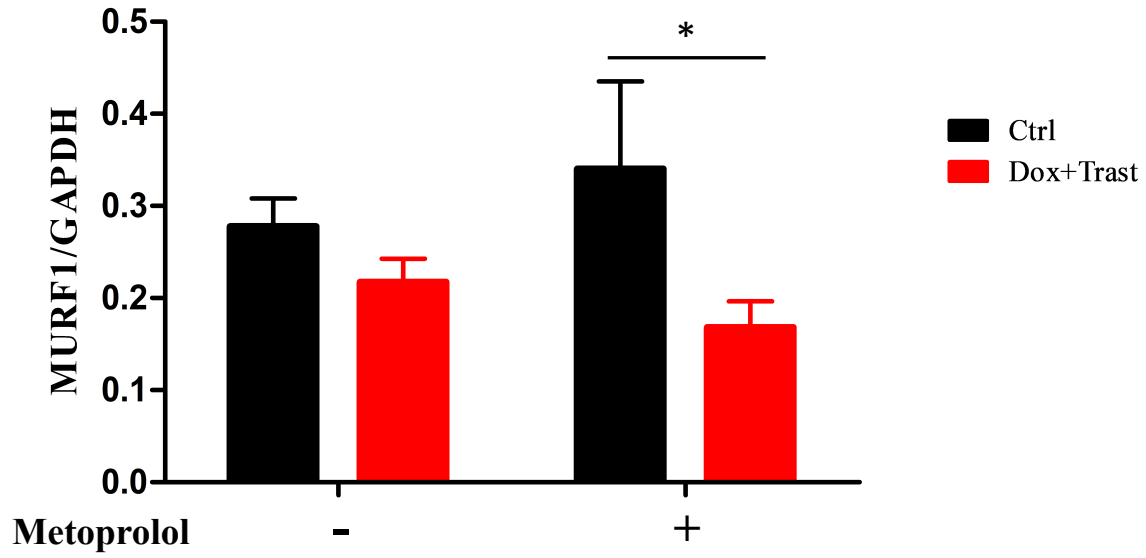

Supplement: EHF2-8-928-s002.pdf [file EHF2-8-928-s002.pdf]

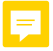

A

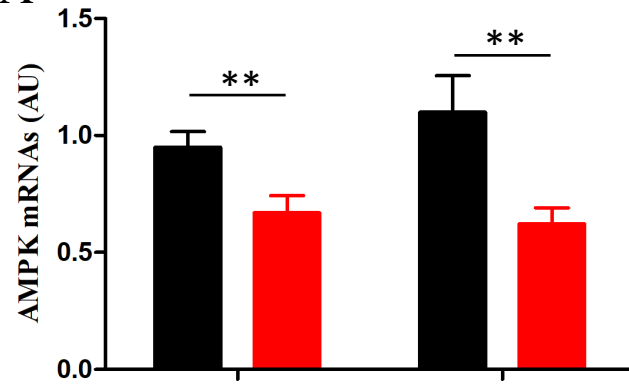

Metoprolol

-

+

■ Ctrl

■ Dox+Trast

B

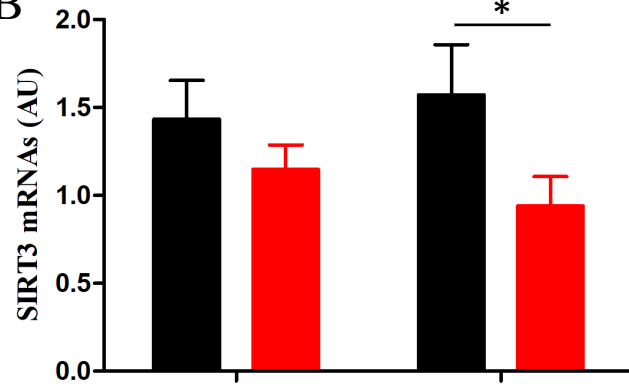

Metoprolol

-

+

Supplement: EHF2-8-928-s004.pdf [file EHF2-8-928-s004.pdf]

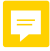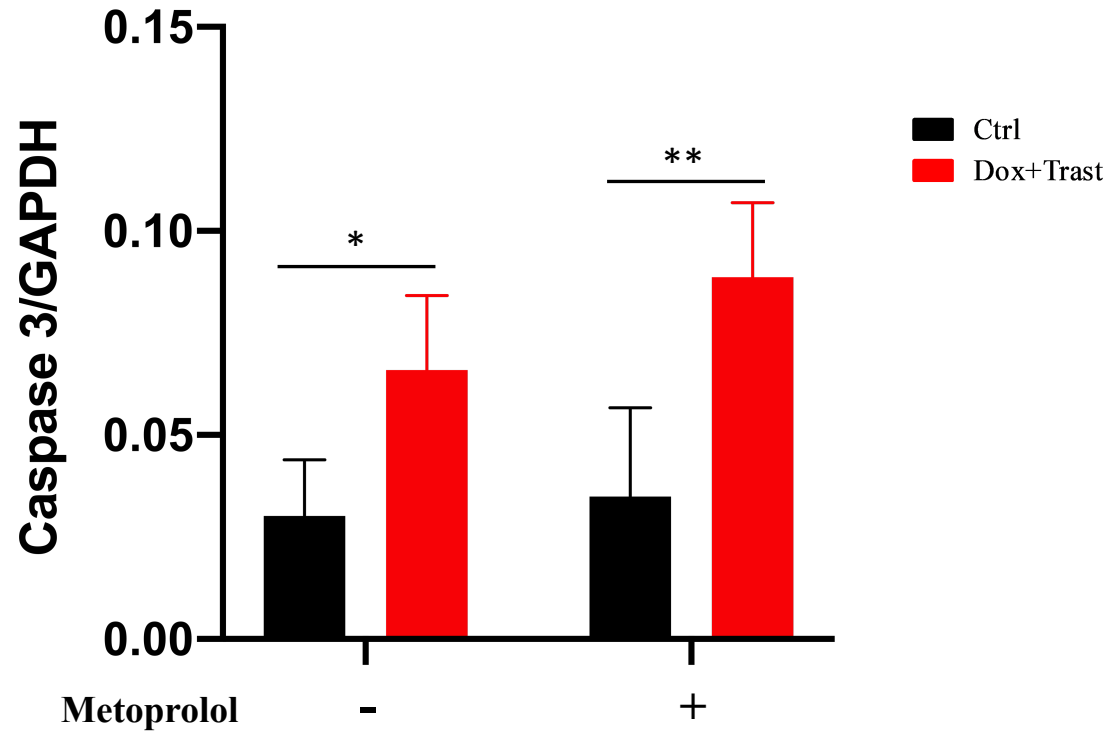

Supplement: EHF2-8-928-s005.pdf [file EHF2-8-928-s005.pdf]
